# Supplementary material for: The Lifted Veil of Uncommon EGFR Mutation p.L747P in Non-Small Cell Lung Cancer: Molecular Feature and Targeting Sensitivity to Tyrosine Kinase Inhibitors
Source: PubMed Central journal article supplement (PMC8873585; doi:10.3389/fonc.2022.843299), 2022-02-11

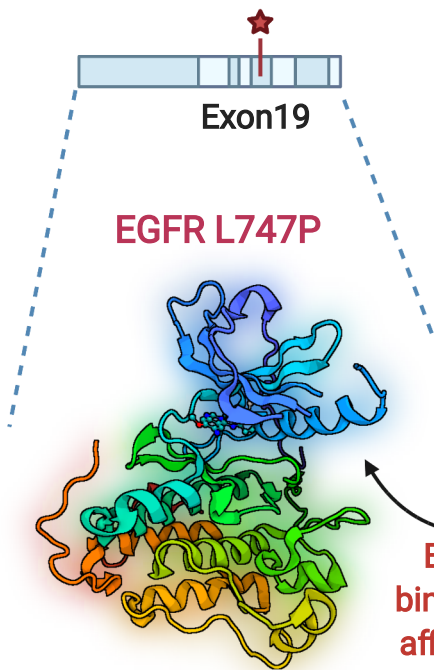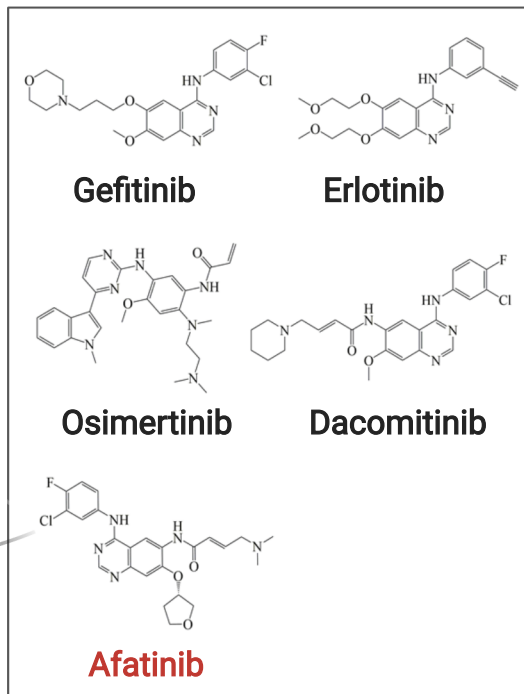

**Best  
binding  
affinity**

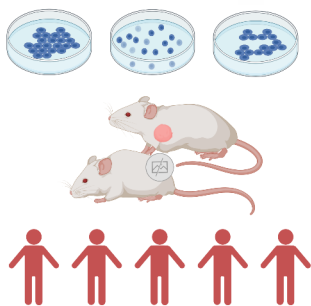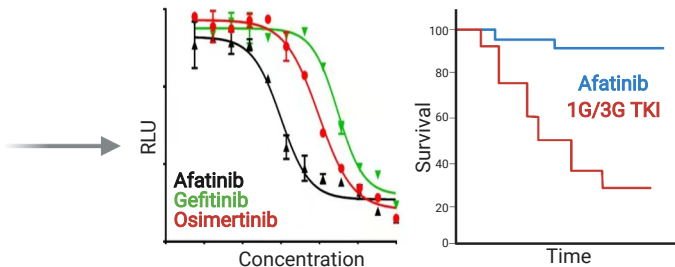

Supplement: DataSheet_1.pdf [file DataSheet_1.pdf]
